# Supplementary material
Source: publisher figshare collection journal article supplement (https://gsajournals.figshare.com/ndownloader/files/20034632)
Supplement: Supplementary file 1 [file 20034632]

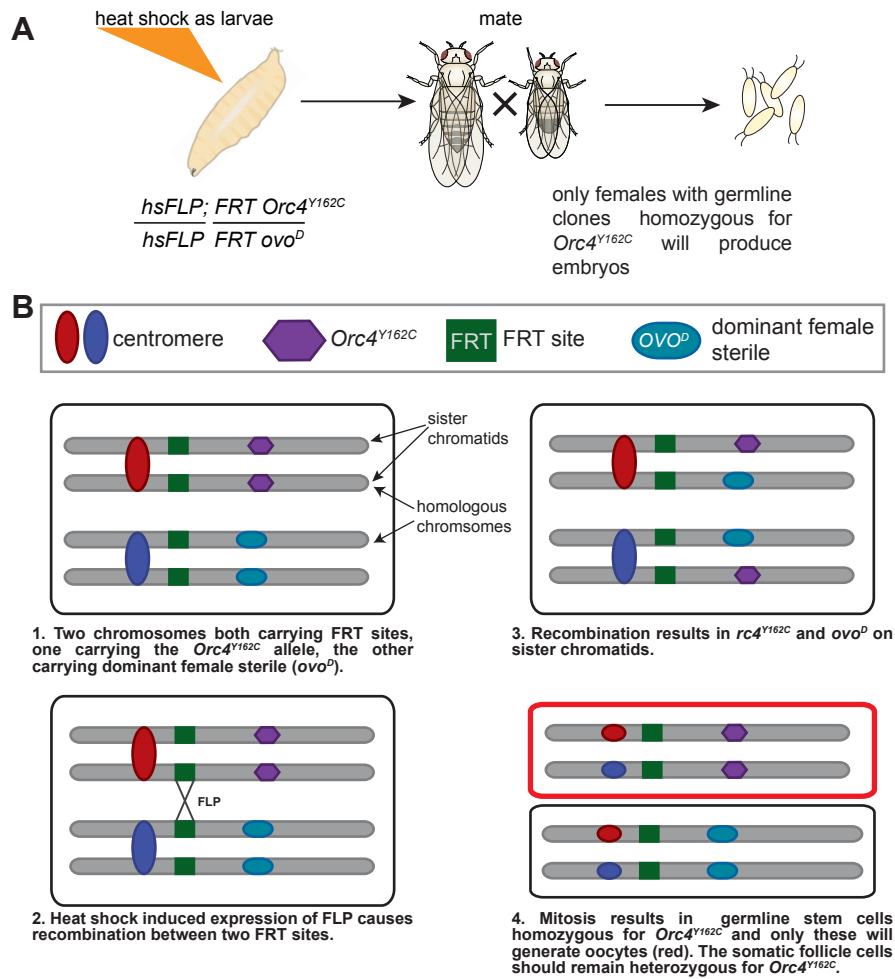

**Figure S4:** (A) Scheme for heat-shock generation of germline clones used to generate embryos maternally depleted of  $Orc4^{Y162C}$ . (B) Diagram of FRT-mediated mitotic recombination in the ovary to used to generate eggs homozygous for  $Orc4^{Y162C}$ .
